1 **Quantitative Cellular-Resolution Map of the Oxytocin Receptor in Postnatally Developing**  
2 **Mouse Brains**

3 Kyra T. Newmaster<sup>1</sup>, Zachary T. Nolan<sup>1</sup>, Uree Chon<sup>1</sup>, Daniel J. Vanselow<sup>1,2</sup>, Abigael R. Weit<sup>1</sup>,  
4 Manal Tabbaa<sup>3</sup>, Shizu Hidema<sup>4,5</sup>, Katsuhiko Nishimori<sup>4,6</sup>, Elizabeth A.D. Hammock<sup>3</sup>, Yongsoo  
5 Kim<sup>1\*</sup>

6 Affiliation:

7 <sup>1</sup>Department of Neural and Behavioral Sciences, <sup>2</sup>Department of Pathology, Penn State  
8 University College of Medicine, Hershey, PA

9 <sup>3</sup>Department of Psychology and Program in Neuroscience, Florida State University, Tallahassee,  
10 FL

11 <sup>4</sup>Tohoku University Graduate School of Agricultural Science, Miyagi, Japan

12 \*Corresponding author

13 Present Address: <sup>5</sup>Department of Bioregulation and Pharmacological Medicine, <sup>6</sup>Department of  
14 Obesity and Internal Inflammation, Fukushima Medical University, Hikarigaoka 1, Fukushima  
15 City, Fukushima Prefecture, Japan

16

17 **Correspondence:** Yongsoo Kim ([yuk17@psu.edu](mailto:yuk17@psu.edu))

18

19 **Key words (up to 10):** Oxytocin receptor, oxytocin, postnatal development, brain mapping,  
20 brain atlas, whole brain expression, developmental qBrain, sexual dimorphism

21

22 **Abstract**

23 Oxytocin receptor (OTR) plays critical roles in social behavior development. Despite its  
24 significance, brain-wide quantitative understanding of OTR expression remains limited in  
25 postnatally developing brains. Here, we validated and utilized fluorescent reporter mice  
26 (OTR<sup>venus/+</sup>) to examine OTR cells across postnatal periods. We developed postnatal 3D template  
27 brains to register whole brain images with cellular resolution to systematically quantify OTR cell  
28 densities. We found that cortical regions showed temporally and spatially heterogeneous patterns  
29 with transient postnatal OTR expression without cell death. Cortical OTR cells were largely not  
30 GABAergic neurons with the exception of cells in layer 6b. Subcortical regions showed similar  
31 temporal regulation except the hypothalamus. Moreover, our unbiased approach identified two  
32 hypothalamic nuclei with sexually dimorphic OTR expression. Lastly, we created a website to  
33 easily share our imaging data. In summary, we provide comprehensive quantitative data to  
34 understand postnatal OTR expression in the mouse brain.

35

## 36 Introduction

37 Oxytocin receptor (OTR) mediates oxytocin (OT) signaling which plays a critical role in the  
38 development of social behavior for animals including humans<sup>1-3</sup>. Animal models lacking  
39 functional OTR show social behavior impairment<sup>4,5</sup> suggesting that OTR expression is  
40 important for normal social behavior. OTR expression begins early in life with peak cortical  
41 OTR expression coinciding with critical postnatal developmental windows for social learning  
42<sup>2,6,7</sup>. This transient OTR expression in the developing cortex is thought to play an important role  
43 in facilitating neural circuit maturation<sup>8,9</sup>. For instance, OTR in postnatally developing brains  
44 has been implicated in multisensory binding<sup>10</sup>, maturation of GABAergic neurons<sup>11</sup>, and  
45 synapse formation and maturation between neurons<sup>12,13</sup>.

46 During the early postnatal period and adulthood, many different brain regions contain OTR  
47 expressing cells that are either excitatory or inhibitory neurons<sup>6,12,14,15</sup>. OTR expressing neurons  
48 in different brain regions have been linked to neural circuit specific functions such as facilitating  
49 social reward in the ventral tegmental area<sup>16</sup>, social recognition in the anterior olfactory nucleus  
50<sup>17</sup>, and social memory in the hippocampal CA2 region<sup>18,19</sup>. However, we have limited  
51 knowledge on the temporal and regional expression patterns of OTR throughout the entire brain.  
52 Previous studies investigating OTR expression mainly utilized receptor autoradiography binding  
53 assays, histological methods (e.g., immunohistochemistry using specific antibodies), or  
54 transgenic reporter animals<sup>6,15,20,21</sup>. Most of these studies, if not all, examined selected brain  
55 regions by histological methods, which is difficult to apply for whole brain analysis across  
56 developmental periods due to variable staining results, laborious procedures, and semi-  
57 quantitative assessment.

58 To overcome this issue, we developed new postnatal template brains at different postnatal (P)  
59 developmental periods (P7, 14, 21, and 28) with detailed anatomical labels based on Allen  
60 Common Coordinate Framework<sup>22</sup>. Then, we expanded our existing quantitative brain mapping  
61 platform (qBrain)<sup>23</sup> to image, detect, and quantify fluorescently labeled cells at the cellular  
62 resolution from postnatally developing brains (developmental qBrain; dqBrain). We applied this  
63 method to quantify the number and density of OTR (+) cells using OTR-Venus knock-in reporter  
64 mice (OTR<sup>venus/+</sup>) after confirming its faithful representation of endogenous OTR expression  
65 using fluorescent *in situ* hybridization<sup>20</sup>. We found temporally and spatially heterogeneous

66 cortical and subcortical expression with early postnatal peak densities. Our cumulative labeling  
67 revealed that cortical OTR reduction into adulthood is mainly driven by receptor down-  
68 regulation without cell death. Furthermore, we identified sexually dimorphic OTR expression in  
69 two hypothalamic nuclei. Lastly, we deposited postnatal template brains and high-resolution  
70 image data with user friendly visualization in our website (<http://kimlab.io/brain-map/OTR/>) to  
71 facilitate open data sharing.



## 72 **Result**

### 73 **Choice of fluorescent reporter mice for OTR expression**

74 To quantify OTR expression across the whole brain, we used two transgenic reporter mice that  
75 express fluorescent reporters under the OTR promoter. The lines we examined include a BAC  
76 transgenic OTR-eGFP reporter mouse<sup>24</sup> and a knock-in OTR<sup>venus/+</sup> heterozygote mouse, called  
77 “OTR-Venus” hereafter, that encodes a fluorescent reporter gene (Venus) in place of the  
78 genomic OTR coding region<sup>20</sup>. We initially observed significant discrepancies in the number and  
79 location of cells reporting OTR expression between the two mouse lines (Figure 1). In order to  
80 independently validate these observations, we used single-molecule mRNA fluorescent *in situ*  
81 hybridization against OTR in postnatally developing mouse brains. We first confirmed the  
82 specificity of the OTR *in situ* hybridization by comparing expression of OTR mRNA wild type  
83 littermates mice (WT; n = 3 mice, Figure 1A-J) and OTR knockout mice (OTR<sup>venus/venus</sup>; n = 2  
84 mice, Figure 1K) at P21. OTR<sup>venus/venus</sup> mice expressed no OTR mRNA whereas their wild-type  
85 littermates showed robust expression. Then, we compared our OTR *in situ* hybridization results  
86 (WT; n = 3 mice) to fluorescent reporter expression from both OTR-Venus (n = 10) and OTR-  
87 eGFP mice (n = 10) at P21. We found that Venus expression from OTR-Venus mice overall  
88 matched to endogenous OTR expression very closely while OTR-eGFP often lacked comparable  
89 expression (false negative) or misrepresented OTR expression (false positive) in several brain  
90 regions (Figure 1A-I). For example, the prelimbic cortex (PL) and the taenia tecta (TT) showed  
91 distinct OTR expressions in both OTR *in situ* and OTR-Venus while very little expression in  
92 OTR-eGFP mice (Figure 1B, C). We also observed that GFP labeled cells in OTR-eGFP mice  
93 were mostly restricted to the superficial layer of the somatosensory cortex while OTR-Venus  
94 mice showed a population of Venus-labeled cells in both superficial and deep layer which  
95 corresponded to the RNA *in situ* results for analogous areas (Figure 1E). In the posterior cortical  
96 area, the OTR-Venus mice exhibit OTR expression that is well-matched to our OTR *in situ* data  
97 while OTR-eGFP reports little expression in the layer 2 of the visual cortex (white arrows in  
98 Figure 1H). RNA *in situ* data also shows that OTR is strongly expressed in the bed nucleus of  
99 stria terminalis posterior interfascicular division (BSTif) which is correctly reported by the OTR-  
100 Venus reporter (Figure 1F). However, OTR-eGFP mice report GFP expression in the BST  
101 posterior principal nucleus (BSTpr), not in the BSTif (Figure 1F). Moreover, robust OTR

102 expression in the posteromedial cortical amygdala (COApm) was observed in both the OTR *in*  
103 *situ* data and the OTR-Venus reporter while little expression was found in the OTR-eGFP  
104 reporter (Figure 1I). We further analyzed OTR-Venus expression at adult stage (at P56) in  
105 relation to OTR mRNA expression data from publically available *in situ* database from Allen  
106 Institute for Brain Science<sup>25</sup> and confirmed comparable expression patterns in OTR-Venus mice  
107 (Figure S1). We then examined whether the Venus mRNA and OTR mRNA were co-expressed  
108 in the same cells from OTR-Venus mice by using double fluorescent *in situ* hybridization (Figure  
109 1J). We confirmed that the majority of Venus positive cells also express OTR mRNA (83.8%,  
110 321 OTR positive cells among 383 Venus positive cells in the cortex, the amygdala, and the  
111 hippocampus, N = 3, P21 mice).

112 Collectively, we concluded that the OTR-Venus mice can serve as a good reporter line to  
113 examine the developmental trajectory of the OTR expression.

114

### 115 **Quantitative brain-wide mapping pipelines in postnatally developing brains**

116 We previously established a quantitative brain mapping method (termed “qBrain”) that can count  
117 the number and the density of fluorescently labeled cells in over 600 different anatomical regions  
118 across the entire adult mouse brain with cellular resolution precision<sup>23</sup>. The method consists of  
119 whole brain imaging at cellular resolution using serial two-photon tomography, machine learning  
120 based algorithms to detect fluorescently labeled cells, image registration to a reference brain, and  
121 statistical analysis<sup>23</sup>. To extend the method to map signals in postnatally developing brains, we  
122 established registration template brains from different early postnatal periods: P7, 14, 21, and 28  
123 (Figure 2)<sup>26</sup>. First, we chose the best imaged brain at each age (Figure S2). Then, we registered  
124 brains from the same age to the initial template brain. Lastly, we averaged all transformed brains  
125 to generate an averaged template brain at each age (N = 8 brains at P7, 15 at P14, 12 at P21, and  
126 17 at P28). Furthermore, we generated age-matched anatomical labels by transforming labels  
127 from the adult brain based on the Common Coordinate Framework (CCF) from Allen Institute  
128 for Brain Science to template brains from younger ages (Figure S2). With these tools, termed  
129 “developmental qBrain” (dqBrain), we were able to register our image data to age-matched  
130 template brains to quantify fluorescently labeled cells across the entire brain at different  
131 postnatal ages (Figure 2, Movie S1-5).

132

### 133 **Developmental expression pattern of OTR neurons in the isocortex (neocortex)**

134 To examine regional and temporal heterogeneity of OTR expression, we imaged OTR-Venus  
135 mice at five different postnatal days (P7, 14, 21, 28 and 56, N = 5 males and 5 females per age).  
136 First, we examined OTR expression in the isocortex (Figure 3, Movie S1-5). Our data showed  
137 that overall cortical OTR density reaches its peak at P21 and decreases into adulthood (the red  
138 line in Figure 3B). We also noticed spatially heterogeneous expression in different cortical areas  
139 (Figure 3B). For example, the anterior cingulate and the retrosplenial cortex, parts of the medial  
140 association area, showed low OTR density, while the visual and lateral association areas (e.g.,  
141 the temporal association area) showed higher OTR density (Figure 3B). Mapping data also  
142 revealed temporally heterogeneous patterns. For example, the somatosensory area reached its  
143 near peak expression at P14 (bottom panel in Figure 3A; black line in 3B) while the visual area  
144 showed rapid increases up to P21 (top panel in Figure 3A; blue line in 3B). To further visualize  
145 the temporally and spatially heterogeneous OTR expression patterns more intuitively, we used  
146 cortical flatmaps throughout the developing brain<sup>23</sup>. Cortical flatmaps are digitally flattened 2D  
147 maps of 3D cortical areas that use evenly spaced bins as a spatial unit to quantify and to display  
148 detected signals<sup>23</sup>. The cortical flatmap clearly highlighted regional differences in OTR  
149 developmental expression with early expression in visual, medial prefrontal, and lateral  
150 association area as early as P7 (Figure 3C). In contrast, somatosensory regions showed little  
151 OTR expression at P7 with a rapid increase in OTR density at P14 (the yellow arrow in the  
152 Figure 3C). By P21, regional heterogeneity attained an adult-like pattern although adults showed  
153 lower OTR density overall (Figure 3C). Interestingly, the medial prefrontal cortex (mPFC)  
154 showed a less dramatic decrease in OTR density as mice progressed to adulthood when  
155 compared to other cortical regions, which matches previous results reporting robust OTR  
156 expression in the adult mPFC<sup>14,27</sup> (the green line in the Figure 3B, the green arrow in 3C).

157 We also noticed higher OTR density in the superficial cortical layers (Layer 1 – 3) compared to  
158 deeper layers (Layer 5 – 6) particularly at P14 and P21 (Figure 3A). To understand how this  
159 cortical layer specific expression affects developmental OTR patterns, we used layer specific  
160 cortical flatmaps to visualize the superficial and deep layer expression patterns separately (Figure  
161 S3). We found that OTR in the superficial layer appears earlier and peaks earlier (at around P14)

162 than the deep layers. The superficial layers also show a more pronounced reduction in adulthood  
163 compared to the deep layer (Figure S3). At P14, the superficial layer expression patterns of the  
164 somatosensory cortex are well-matched with previous OTR autoradiography and mRNA *in situ*  
165 data (green arrow in Figure S3A)<sup>6,10</sup>. Moreover, relative OTR expression in different cortical  
166 layers across postnatal periods clearly showed that OTR expression is predominantly found in  
167 the superficial layers at P7 and P14 but shifts to similar or even relatively greater density in the  
168 deep layer. This pattern is largely driven by the transient OTR expression in the superficial layers  
169 (Figure S3C).

170 Collectively, these data suggest that developmental OTR expressions differ quantitatively in  
171 different cortical areas and even different layers within the same cortical region.

172

### 173 **Receptor down-regulation is the main mechanism of postnatal OTR reduction**

174 Reduction of OTR expressing cells in the adult isocortex can be explained by either receptor  
175 down-regulation or programmed cell death during early postnatal development. For example,  
176 40% of interneurons in the mouse cortex are eliminated during the postnatal period via  
177 programmed cell death<sup>28</sup>. To understand the main mechanism dictating the transient nature of  
178 OTR expression, we crossed mice expressing Cre recombinase under the OTR promoter (OTR-  
179 Cre knock-in mice) with Cre dependent reporter mice (Ai14) that express the tdTomato  
180 fluorescent reporter (Figure 4A). The presence of Cre, even if transient as seen during  
181 developmental periods, leads to permanent expression of tdTomato (Figure 4A). If OTR (+) cells  
182 were undergoing cell death, we would expect to see a reduced number of tdTomato (+) cells in  
183 the adult brain. On the other hand, if OTR is simply down-regulated but the cells remain,  
184 tdTomato (+) cell density should not decrease in adulthood. When we quantified cortical  
185 tdTomato (+) cells from OTR-Cre: Ai14 mice using the dqBrain method for OTR-Venus mice,  
186 we observed that the average density of tdTomato (+) cells began to plateau at around P21  
187 without any reduction in the adult stage at P56 (Figure 4B-C). Rather, OTR density continued to  
188 increase slightly between P21 and P56 largely because of the developmental accumulation of  
189 tdTomato within cells leading to slightly higher cell counting in later ages. In summary, this data  
190 suggests that developmental regulation of OTR in the isocortex is mainly driven by receptor  
191 down-regulation, not by cell death.

192

### 193 **Layer specific cell type composition of OTR neurons in the isocortex**

194 Neurons in the mouse isocortex are composed of non-overlapping glutamatergic (excitatory) and  
195 GABAergic (inhibitory) neurons with roughly a 4:1 ratio<sup>29</sup>. OTR is known to be expressed in  
196 both glutamatergic and GABAergic cortical neurons<sup>14,27,30</sup>. In order to determine the cell type of  
197 OTR expressing cortical neurons during postnatal development, we performed  
198 immunohistochemistry against GAD67, a marker for GABAergic neurons, in OTR-Venus mice  
199 at P21 and P56 (N = 3 mice per age, 3 representative sections per brain region; Figure 5). We  
200 examined the medial prefrontal cortex, the somatosensory cortex, and the visual cortex at three  
201 different cortical layers; upper layer for layer 1 – 3, deeper layer for layer 4 – 6a, and layer 6b  
202 (Table1). We found that the minority of OTR-Venus cells (at around 20%) in both upper and  
203 deeper layers are GABAergic in both ages (Figure 5, Table 1). In contrast, the majority of OTR-  
204 Venus cells in the deepest cortical layer (layer 6b) were GABAergic in both ages (Figure 5,  
205 Table 1). Interestingly, a previous study showed that these deep layer OTR positive neurons are  
206 mostly long-range projecting somatostatin neurons<sup>31</sup>. There was no noticeable difference of  
207 OTR neuronal subtype composition in the isocortex between P21 and P56 (Table 1).

208

### 209 **Developmental expression of OTR neurons in subcortical brain regions**

210 Kinetics of neural circuit maturation vary significantly between different brain regions<sup>32</sup>. Since  
211 OTR is widely expressed in different brain regions outside of the cortex, we sought to find  
212 whether these brain regions undergo similar expression trajectory to the isocortex in postnatally  
213 developing brains. We first examined ten large brain regions (the olfactory area, the hippocampal  
214 area, the striatum, the pallidum, the cerebellum, the thalamus, the hypothalamus, the midbrain,  
215 the pons, and the medulla) based on the Allen Brain Atlas ontology<sup>22</sup>. The olfactory areas  
216 express OTR at the highest levels (Purple line in Figure 6A, Movie S1-5) as exemplified by a  
217 very high OTR density in the anterior olfactory nucleus (Figure 6B). In contrast, the cerebellum  
218 and the thalamus showed the lowest OTR densities (grey and yellow lines in Figure 6A,  
219 respectively) with a few noticeable exceptions including relatively high expression in the  
220 paraventricular thalamus (Figure 6E). There are also several noticeable subcortical areas with

221 strong expression including the magnocellular nucleus (also called “magnocellular preoptic  
222 area”), a part of the basal forebrain area (Figure 6C). We also observed prominent expression in  
223 specific hippocampal areas including the subiculum (Figure 6F). All areas except the  
224 hypothalamus reached their peak OTR densities at P21 with slight decrease in adulthood (Figure  
225 6A). Interestingly, we observed continued increase of OTR in many hypothalamic nuclei until  
226 adulthood including the ventral medial hypothalamus ventral lateral, which matched previous  
227 OTR binding assays in rats<sup>33</sup>(Figure 6A, D). A detailed list of OTR cell density across all brain  
228 regions at different ages can be found in Table S1.

229

### 230 **Sexual dimorphism of OTR expression**

231 OTR is expressed in a sexually dimorphic manner as a part of neural circuit mechanism to  
232 generate behavioral differences in males and females<sup>34,35</sup>. Therefore, we examined OTR-Venus  
233 mice (N=5 in each male and female brains at different ages) to determine if there were any  
234 regions showing strong sexual dimorphism. Across the entire brain region throughout the  
235 postnatal development, we found significant sexual dimorphism in two hypothalamic regions  
236 (Figure 7). The ventral premammillary nucleus showed significantly higher OTR expression in  
237 males compared to females between P14 and P56 (Figure 7A). In contrast, the anteroventral  
238 periventricular nucleus (AVPV) near the medial preoptic area showed higher OTR expression in  
239 females than males at P56, but not before (Figure 7B). A recent study identified abundant  
240 estrogen-dependent OTR expressing cells in the AVPV, co-expressing estrogen receptor in  
241 female mice<sup>36</sup>. This result suggests a potential role of OTR in sexual behavior<sup>36-38</sup>.

242

### 243 **Web based resource sharing**

244 Our high-resolution whole brain OTR expression dataset can serve as a resource for future  
245 studies examining how OTR regulates different neural circuits in postnatal development and  
246 adulthood. Moreover, our newly generated postnatal template brains can be used to map signals  
247 from different studies in the same spatial framework. To facilitate this effort, we created a  
248 website (<http://kimlab.io/brain-map/OTR>) to share our imaging data and other data resources  
249 from the current study. Data included in this paper can be easily visualized and downloaded from

250 different web browsers including mobile devices. We highly encourage readers to explore this  
251 whole brain dataset on our website to investigate OTR expression in their regions of interest.



## 252 Discussion

253 Here, we provide highly quantitative brain-wide maps of OTR expression in mice during the  
254 early postnatal developmental period and adulthood. We established new mouse brain templates  
255 at different postnatal ages and applied our dqBrain method to image and quantify fluorescently  
256 labeled signals at cellular resolution in postnatally developing brains<sup>23</sup>. We found spatially and  
257 temporally heterogeneous developmental OTR expression patterns in different brain regions.  
258 Moreover, we found sexually dimorphic OTR expression in two hypothalamic regions. Lastly,  
259 our high-resolution imaging data is freely accessible via an online viewer as a resource for the  
260 neuroscience community.

261 OT signaling via OTR plays a pivotal role in postnatal brain development and is a key  
262 component of multi-sensory processing required to generate mature social behavior<sup>39,40</sup>.  
263 Moreover, quantitative changes of OTR have been correlated with social behavioral variation in  
264 both normal and pathological conditions<sup>40,41</sup>. For example, OTR expression levels within a brain  
265 region change based on early social experience<sup>42,43</sup>. These findings suggest that OTR expression  
266 may be uniquely linked to the early postnatal development of social behavior. Thus, our data  
267 provides a quantitative understanding of OTRs developmental patterns in different neural circuits  
268 during critical periods of social behavior development.

269 We chose to use OTR-Venus mice to examine the whole brain OTR expression patterns  
270 throughout postnatal developmental periods after confirming that this reporter line provides a  
271 faithful representation of endogenous OTR expression using fluorescent *in situ* hybridization.  
272 The OTR-Venus expression patterns described here largely agree with previous histological  
273 studies focused on selected brain regions and/or ages<sup>6,7,21,33,40,44-47</sup>. With its rapid protein  
274 maturation and decay half-life<sup>48,49</sup>, Venus served as an ideal reporter protein for  
275 developmentally transient OTR expression in the entire brain which enabled us to circumvent  
276 laborious histological staining.

277 Our data driven approach uncovered quantitative insights about postnatal OTR expression. First,  
278 there are significantly heterogeneous spatial and temporal patterns of OTR expression across  
279 different cortical domains. For example, OTR expression emerged in visual-auditory cortices as  
280 early as P7 and then propagated to the somatosensory cortex at P14, reaching overall peak  
281 expression at P21. Since mice do not open their ears and eyes until about two weeks after birth



282 <sup>50</sup>, OTR expression in the visual-auditory areas precedes corresponding sensory inputs. Previous  
283 studies showed that OT signaling via OTR promotes synaptogenesis and facilitates synaptic  
284 maturation in postnatally developing brains <sup>10,12,51</sup>. This evidence raises the possibility that early  
285 OTR expression may prime cortical areas for incoming sensory signals. Rapid increase of the  
286 OTR expression in P14 – 21 corresponds with the peak time of synaptic formation and  
287 maturation in rodent brains <sup>52,53</sup>. Synaptic maturation patterns differ in cortical layers during  
288 early postnatal periods <sup>54,55</sup>. For example, tactile stimulus specific activity pattern emerges in the  
289 superficial layers of the barrel cortex which is subsequently followed by deep layer maturation in  
290 mice <sup>55</sup>. Interestingly, we found that OTR expressed more abundantly in the superficial layers at  
291 early postnatal time points (P7 and P14) followed by equal or relatively denser expression in the  
292 deep layer. This layer specific temporal cortical expression is mainly driven by transient OTR  
293 expression in the superficial layer at the early postnatal period between P14 – 21. Since this early  
294 postnatal period represents strengthening synaptic connections in the superficial layer 2/3 <sup>56</sup>,  
295 transient OTR is ideally positioned to modulate synaptic maturation in the superficial layer.  
296 Second, we found that most subcortical regions also show their peak OTR expression at P21  
297 followed by reduction into adulthood. This pattern agrees with previous observations that adult  
298 OTR patterns are established around three weeks postnatal age in mice <sup>7</sup>. In contrast, the  
299 hypothalamic area showed a continuous increase into adulthood with sexually dimorphic  
300 expression of OTR in the PMv and AVPV, parts of the hypothalamic behavioral control column  
301 that generates sexually motivated behavior <sup>38</sup>. This suggests that OTR in hypothalamic nuclei  
302 plays a role in generating sex-specific behavior during sexual maturation <sup>36,40,57</sup>.

303 From a technical point of view, our dqBrain method is a significant departure from previous  
304 semi-quantitative histological methods. Our method provides a quantitative way to compare and  
305 contrast any fluorescently labeled signals in postnatally developing brains with various  
306 experimental conditions. Moreover, our newly established postnatal templates can help to map  
307 signals from other 3D imaging modalities (e.g., light sheet fluorescent microscopy) to age-  
308 matched spatial framework for quantitative comparisons. Previously, there has been significant  
309 effort to create common atlas framework to integrate findings from different studies in the adult  
310 mouse brain <sup>58-60</sup>. Our postnatal template brains can serve as a common platform to study various  
311 signals from developing brains.

312 Lastly, our quantitative expression data with easy web based visualization provides a resource to  
313 examine OTR expression of any target brain region at different postnatal ages. Such open data  
314 sharing has proven to be useful in disseminating hard-earned anatomical data to the larger  
315 scientific community<sup>61,62</sup>. In summary, we envision that our data will guide future circuit based  
316 investigation to understand the mechanism of oxytocin signaling in relationship with different  
317 behavioral studies in postnatally developing and adult brains.

## 318 **Material and Methods**

### 319 **Animals**

320 Animal procedures are approved by Florida State University, Tohoku University, and the Penn  
321 State University Institutional Animal Care and Use Committee (IACUC). Mice were housed  
322 under constant temperature and light condition (12 hrs light and 12 hrs dark cycle) and received  
323 food and water ad libitum. OTR-eGFP mice<sup>24</sup> were originally obtained from Mutant Mouse  
324 Resource and Research Center (MMRRC) with a mixed FVB/N x Swiss-Webster background  
325 strain. OTR-Venus mice<sup>20</sup> were originally produced and had their brains collected in Tohoku  
326 University (Nishmori Lab). Later, OTR-Venus line was imported to the Penn State University  
327 (Kim Lab). OTR-Venus brains used in the current study came from both Tohoku University and  
328 Penn State University. OTR-Cre line was originally established by Hidema et al.,<sup>63</sup> and imported  
329 to the Penn State University via mouse rederivation. Both OTR-Venus and OTR-Cre mice are  
330 129 x C57BL/6J mixed genetic background. OTR-Cre mice were then crossed with Ai14 (Jax:  
331 007914, C57Bl/6J background) to generate OTR-Cre: Ai14 mice. All mouse lines were generated  
332 using continuously housed breeder pairs and P21 as the standard weaning date.

333

### 334 **Brain sample preparation, STPT imaging and related data analysis**

335 Mice at various postnatal days were perfused by transcardiac perfusion with 0.9% NaCl saline  
336 followed by 4% paraformaldehyde in 0.1M phosphate buffer (PB, pH 7.4). Brains were further  
337 fixed overnight at 4°C and switched to 0.1M or 0.05M PB next day until imaging. Detailed  
338 procedure of STPT imaging was described previously<sup>23,26</sup>. Briefly, fixed brains were embedded  
339 in oxidized agarose and cross-linked by 0.05M sodium borohydrate buffer at 4°C overnight to  
340 improve vibratome cutting during STPT imaging. For the STPT imaging, we used 910nm and  
341 970nm to image OTR-eGFP and OTR<sup>Venus/+</sup> mice, respectively. We acquired images at 1 μm (*x*  
342 and *y*) resolution in every 50 μm *z* section throughout the entire brain. For image registration to  
343 reference template brains, we used Elastix to register brains to age-matched reference template  
344 brains using 3D affine transformation with 4 resolution level, followed by a 3D B-spline  
345 transformation with 6 resolution level<sup>23</sup>. We used a machine learning algorithm to detect  
346 fluorescently marked cells in serially collected 2D images. To convert the 2D counting to 3D

347 counting, 2D cell counting numbers were multiplied by a 3D conversion factor (1.4) to estimate  
348 the total numbers of cells in each anatomical volume based on our previous calculation with  
349 cytoplasmic signals<sup>23</sup>. To calculate the volume of each brain region, we registered age-matched  
350 template brains to each brain sample using Elastix. Then, voxel numbers of each anatomical  
351 label were multiplied by  $20 \times 20 \times 50 \mu\text{m}^3$  (3D volume of anatomical voxel unit) to calculate  
352 volumes of each anatomical region<sup>23</sup>. The 3D estimates of cell numbers in each anatomical  
353 region were divided by corresponding regional volume to generate density measurement per  
354  $\text{mm}^3$  in each anatomical area (Table S1). All custom built codes were included in the previous  
355 publication<sup>23</sup>.

356

### 357 **Statistical analysis**

358 Density of fluorescently labeled cells in different anatomical regions including flatmap were  
359 presented as mean (Figure 3B-C, Figure 4C, Figure 6A, and Figure S3C) or mean  $\pm$  standard  
360 deviation (Figure 6B-F and Figure 7A4 - B4). To identify sexual dimorphism, we performed  
361 statistical comparisons between males and females in OTR-Venus cell counts across different  
362 anatomical regions using open source statistical package ‘‘R’’. We estimated our sample size  
363 using the power analysis as performed in our previous publication<sup>23</sup>. When significance level ( $\alpha$   
364  $< 0.05$ ) and assumed effect size (0.85), we expected that over 80% of anatomical regions reach  
365 sufficient power with  $N = 5$  samples per group. For statistical analysis between groups, we  
366 assumed the cell counts at a given anatomical area follow a negative binomial distribution and  
367 performed statistical analysis as described before<sup>23,26</sup>. Once the p values were calculated, they  
368 were adjusted using false discovery rates with the Benjamini-Hochberg procedure to account for  
369 multiple comparisons across all ROI locations<sup>23,26</sup>.

370

### 371 **Generating reference templates in different postnatal ages**

372 All the work to generate the reference template brains at different ages was based on 20x  
373 downsized images in  $x$ - $y$  dimension from the original scale, making each image stack at  $20 \times 20$   
374  $\times 50 \mu\text{m}$  ( $x,y,z$ ) voxel resolution. We picked the best-imaged brain with good right-left  
375 hemisphere symmetry (designated as a ‘‘template brain’’) at each age and performed image

376 registration using Elastix to register different age-matched brains to the template brain. Then, we  
377 averaged the transformed brains after the image registration to generate the averaged template  
378 brain at each age (Figure S2). We used either red or green channel images, or both from the same  
379 mouse acquired from the STPT imaging. To establish anatomical labels in averaged template  
380 brains, we used the image registration method to transform the adult atlas with anatomical labels  
381 to fit template brains at different ages. We used the common coordinate framework (CCF) brain  
382 and labels from Allen Institute for Brain Science as our initial atlas platform. Direct registration  
383 from the adult brain to averaged brains at each postnatal age worked well until the P14 brain due  
384 to similarities in postnatal brain morphologies, but not for P7 brains due to more embryonic  
385 brain-like shape. To circumvent this issue, we registered the adult CCF to the P14 template brain  
386 first, then the transformed CCF fit to the P14 brain was registered again to P7 (Figure S2). This  
387 sequential registration worked because the morphological differences between P7 and P14 were  
388 fewer than compared to those between P7 and the adult brain.

389

## 390 **Cortical Flatmap**

391 We previously generated evenly spaced cortical bins to generate a cortical flatmap in an adult  
392 reference brain and devised a method to map detected signal in the flatmap<sup>23</sup>. Here, we further  
393 generated superficial and deep layer cortical flatmaps. First, we created a binary file with layer 1  
394 – 3 for superficial and layer 5 – 6 for deep layer across the entire isocortex. Second, we used the  
395 binary filter to remove unwanted cortical areas from the existing isocortical flatmap in order to  
396 create layer specific cortical flatmap. To quantify signals on flatmaps, we registered all samples  
397 to the reference brain with cortical area bins using Elastix and quantified target signals in each  
398 cortical bin as described in the STPT related data analysis above. We also performed reverse  
399 image registration to warp the adult reference brain to postnatal template brains in order to  
400 calculate the area of cortical bins at different ages. Then, we calculated densities in each cortical  
401 bin based on number of cells and area measurement in each bin. Lastly, the density was plotted  
402 in the cortical flatmap using Excel (Microsoft) and Adobe illustrator as described before<sup>23</sup>.

403

## 404 **Single-molecule mRNA fluorescence *in situ* hybridization**

405 Mice were deeply anesthetized using intraperitoneal injection of anesthesia (100 mg/kg ketamine  
406 mixed with 10 mg/kg xylazine). Then, the animal was decapitated with scissors, and the brain  
407 was immediately dissected out and immersed in Optimal Cutting Temperature (OCT) media  
408 (Tissue-Tek). The immersed brain was quickly frozen using dry ice chilled 2-methylbutane. The  
409 frozen brain was stored at -80°C until used. A cryostat was used to collect coronal brain sections  
410 at 10µm thickness. Sections were stored at -80°C, and *in situ* hybridization was performed within  
411 two weeks of sectioning. We used RNAScope detection kits (ACDBio) to detect and to quantify  
412 target mRNA at single-molecule resolution. We followed the manufacturer's protocols with the  
413 exception that protease III (ACDbio, cat. no. 322340) was applied to tissue for 20 minutes.  
414 Probe-mm-Venus-C1 (ACDbio, cat. no. 493891) and Probe-mm-OTR-C2 (ACDbio, cat. no.  
415 402651-C2) were used to detect Venus and OTR, respectively. Amp4 Alt A was used to detect  
416 OTR alone in red channel, and Alt C was applied to detect OTR and Venus in far red and red  
417 channel, respectively.

418

## 419 **Immunohistochemistry**

420 *Sample preparation:* OTR<sup>Venus/+</sup> mice of both sexes were collected at P21 and P56. Mice were  
421 deeply anaesthetized with intraperitoneal injection of the ketamine/xylazine mixture. Then, mice  
422 were transcardially perfused with 0.9% NaCl saline followed by 4% PFA. Whole heads were  
423 removed and post-fixed in the same fixative at 4°C for 3 days. Then, the brain was dissected out  
424 and sunk down in 30% sucrose in 1x PBS (pH7.4) solution at 4°C for cryoprotection.  
425 Cryoprotected brains were then frozen on dry ice and stored at -20°C until sectioning. 30 µm  
426 thick coronal sections were obtained using a freezing microtome (Leica). Sections were stored in  
427 a cryoprotectant solution (30% sucrose and 30% glycerol in 0.1M phosphate buffer) at -20°C  
428 until immunostaining. *Immunostaining:* All washes were performed for 10 min at room  
429 temperature with gentle rotation unless otherwise specified. Free floating sections were washed  
430 in 1x PBS three times followed by 1 hour of blocking with 1% donkey serum diluted in 1x PBS  
431 at room temperature. Slices were then incubated with a monoclonal primary antibody (mouse  
432 anti-GAD67, Millipore, cat.no. MAB5406, diluted 1:2000) in blocking buffer overnight at 4°C  
433 with gentle rotation. Following primary antibody incubation, the slices were washed in 1x PBS  
434 three times and incubated with secondary antibody (Donkey anti-mouse conjugated with Alexa

435 568, ThermoFisher, cat.no. A10037, diluted 1:500) for 1hr at room temperature. Three washes  
436 were performed in 0.05M phosphate buffer prior to mounting slices with vectashield mounting  
437 media (vector laboratories, cat.no. H-1500-10).

438

439 **Microscopic imaging and quantification:**

440 For both RNA *in situ* and immunostaining, BZ-X700 fluorescence microscope (Keyence) was  
441 used to image large areas using 20x objective lens with 2D image tile stitching. The sectioning  
442 function provided a deconvolution mechanism to capture sharply focused images. Images with  
443 large field of view were exported as Tiff files using the BZ-X analyzer software (Keyence).

444 Image evaluation and cell counting was performed manually using the cell counter plug-in in  
445 FIJI (ImageJ, NIH)<sup>64</sup>. All cell counting was done blindly by two independent experts. For the  
446 Venus and OTR colocalization in Figure 1J, Venus with more than 4 puncta from the RNA in  
447 situ was considered a Venus (+) cell. Images were acquired from cortical, amygdala, and  
448 hippocampal regions. In both OTR-Venus and OTR-Gad67 colocalization studies, two experts  
449 agreed over 95% of colocalization assessment. The final reported number is the averaged value  
450 from two expert's counting.

451

452 **Acknowledgement**

453 This publication was made possible by a NIH R01 MH116176 and Tobacco Cure Funds from the  
454 Pennsylvania Department of Health to Y.K., Strategic Research Program for Brain Sciences  
455 from Japan Agency for Medical Research and Development (AMED; 18dm0107076h0003,  
456 2016-2020) to K.N. and S.H., JSPS Grant-in-Aid for Scientific Research (15H02442, 2015–  
457 2018) to K.N., NIH R01 MH114994 to E.A.D.H., T32 DC000044 to M.T. We thank Rebecca  
458 Betty for assistance in editing the manuscript.

459 Its contents are solely the responsibility of the authors and do not necessarily represent the views  
460 of the funding agency.

461

462

463 **Author Contribution**

464 Project conceptualization: Y.K.; Brain Sample preparation and data acquisition: K.N., Z.T.N,  
465 U.C., M.T., S.H., K.N., E.H.; Data analysis: K.N., Z.T.N, A.R.W., Y.K.; Web visualization:  
466 D.J.V.; Manuscript preparation: K.N., Y.K with help of other authors.

467

468

469 **Competing interests**

470 None

471

472

473

474

475

476



## 477 Reference

- 478 1. Gordon, I., Martin, C., Feldman, R. & Leckman, J. F. Oxytocin and social motivation. *Dev*  
479 *Cogn Neurosci* **1**, 471–493 (2011).
- 480 2. Hammock, E. A. D. Developmental perspectives on oxytocin and vasopressin.  
481 *Neuropsychopharmacology* **40**, 24–42 (2015).
- 482 3. Shamay-Tsoory, S. G. & Abu-Akel, A. The Social Salience Hypothesis of Oxytocin. *Biol*  
483 *Psychiatry* (2015). doi:10.1016/j.biopsych.2015.07.020
- 484 4. Pobbe, R. L. H. *et al.* Oxytocin receptor knockout mice display deficits in the expression  
485 of autism-related behaviors. *Horm Behav* **61**, 436–444 (2012).
- 486 5. Sala, M. *et al.* Mice heterozygous for the oxytocin receptor gene (Oxtr(+/-)) show  
487 impaired social behaviour but not increased aggression or cognitive inflexibility: evidence  
488 of a selective haploinsufficiency gene effect. *J Neuroendocrinol* **25**, 107–118 (2013).
- 489 6. Hammock, E. A. D. & Levitt, P. Oxytocin receptor ligand binding in embryonic tissue and  
490 postnatal brain development of the C57BL/6J mouse. *Front Behav Neurosci* **7**, 195  
491 (2013).
- 492 7. Grinevich, V., Desarmenien, M. G., Chini, B., Tauber, M. & Muscatelli, F. Ontogenesis of  
493 oxytocin pathways in the mammalian brain: late maturation and psychosocial disorders.  
494 *Front Neuroanat* **8**, 164 (2014).
- 495 8. Vaidyanathan, R. & Hammock, E. A. D. Oxytocin receptor dynamics in the brain across  
496 development and species. *Dev Neurobiol* **77**, 143–157 (2017).
- 497 9. Miller, T. V. & Caldwell, H. K. Oxytocin during Development: Possible Organizational  
498 Effects on Behavior. *Front. Endocrin.* **6**, 76 (2015).
- 499 10. Zheng, J.-J. *et al.* Oxytocin mediates early experience–dependent cross-modal plasticity in  
500 the sensory cortices. *Nat Neurosci* **17**, 391–399 (2014).
- 501 11. Tyzio, R. *et al.* Oxytocin-mediated GABA inhibition during delivery attenuates autism  
502 pathogenesis in rodent offspring. *Science* **343**, 675–679 (2014).
- 503 12. Ripamonti, S. *et al.* Transient oxytocin signaling primes the development and function of  
504 excitatory hippocampal neurons. *Elife* **6**, (2017).
- 505 13. Bakos, J., Srancikova, A., Havranek, T. & Bacova, Z. Molecular Mechanisms of Oxytocin  
506 Signaling at the Synaptic Connection. *Neural Plast* **2018**, 4864107–9 (2018).
- 507 14. Nakajima, M., Görlich, A. & Heintz, N. Oxytocin modulates female sociosexual behavior  
508 through a specific class of prefrontal cortical interneurons. *Cell* **159**, 295–305 (2014).
- 509 15. Mitre, M. *et al.* A Distributed Network for Social Cognition Enriched for Oxytocin  
510 Receptors. *Journal of Neuroscience* **36**, 2517–2535 (2016).
- 511 16. Hung, L. W. *et al.* Gating of social reward by oxytocin in the ventral tegmental area.  
512 *Science* **357**, 1406–1411 (2017).
- 513 17. Oettl, L.-L. *et al.* Oxytocin Enhances Social Recognition by Modulating Cortical Control  
514 of Early Olfactory Processing. *Neuron* **90**, 609–621 (2016).
- 515 18. Raam, T., McAvoy, K. M., Besnard, A., Veenema, A. & Sahay, A. Hippocampal oxytocin  
516 receptors are necessary for discrimination of social stimuli. *Nat Commun* **8**, 2001 (2017).
- 517 19. Lin, Y.-T. *et al.* Conditional Deletion of Hippocampal CA2/CA3a Oxytocin Receptors  
518 Impairs the Persistence of Long-Term Social Recognition Memory in Mice. *Journal of*  
519 *Neuroscience* **38**, 1218–1231 (2018).
- 520 20. Yoshida, M. *et al.* Evidence that oxytocin exerts anxiolytic effects via oxytocin receptor  
521 expressed in serotonergic neurons in mice. *Journal of Neuroscience* **29**, 2259–2271

- 522 (2009).
- 523 21. Gould, B. R. & Zingg, H. H. Mapping oxytocin receptor gene expression in the mouse  
524 brain and mammary gland using an oxytocin receptor-LacZ reporter mouse. *NSC* **122**,  
525 155–167 (2003).
- 526 22. Sunkin, S. M. *et al.* Allen Brain Atlas: an integrated spatio-temporal portal for exploring  
527 the central nervous system. *Nucleic Acids Res.* **41**, D996–D1008 (2013).
- 528 23. Kim, Y. *et al.* Brain-wide Maps Reveal Stereotyped Cell-Type-Based Cortical  
529 Architecture and Subcortical Sexual Dimorphism. *Cell* **171**, 456–469.e22 (2017).
- 530 24. Gong, S. *et al.* A gene expression atlas of the central nervous system based on bacterial  
531 artificial chromosomes. *Nature* **425**, 917–925 (2003).
- 532 25. Ng, L. *et al.* An anatomic gene expression atlas of the adult mouse brain. *Nat Neurosci* **12**,  
533 356–362 (2009).
- 534 26. Kim, Y. *et al.* Mapping social behavior-induced brain activation at cellular resolution in  
535 the mouse. *Cell Rep* **10**, 292–305 (2015).
- 536 27. Li, K., Nakajima, M., Ibañez-Tallon, I. & Heintz, N. A Cortical Circuit for Sexually  
537 Dimorphic Oxytocin-Dependent Anxiety Behaviors. *Cell* **167**, 60–72.e11 (2016).
- 538 28. Southwell, D. G. *et al.* Intrinsically determined cell death of developing cortical  
539 interneurons. *Nature* **491**, 109–113 (2012).
- 540 29. Isaacson, J. S. & Scanziani, M. How inhibition shapes cortical activity. *Neuron* **72**, 231–  
541 243 (2011).
- 542 30. Tan, Y. *et al.* Oxytocin receptors are expressed by glutamatergic prefrontal cortical  
543 neurons that selectively modulate social recognition. *Journal of Neuroscience* 2944–18  
544 (2019). doi:10.1523/JNEUROSCI.2944-18.2019
- 545 31. Paul, A. *et al.* Transcriptional Architecture of Synaptic Communication Delineates  
546 GABAergic Neuron Identity. *Cell* **171**, 522–539.e20 (2017).
- 547 32. Dadalko, O. I. & Travers, B. G. Evidence for Brainstem Contributions to Autism  
548 Spectrum Disorders. *Front Integr Neurosci* **12**, 47 (2018).
- 549 33. Tribollet, E., Dubois-Dauphin, M., Dreifuss, J. J., Barberis, C. & Jard, S. Oxytocin  
550 receptors in the central nervous system. Distribution, development, and species  
551 differences. *Ann N Y Acad Sci* **652**, 29–38 (1992).
- 552 34. Rice, M. A., Hobbs, L. E., Wallace, K. J. & Ophir, A. G. Cryptic sexual dimorphism in  
553 spatial memory and hippocampal oxytocin receptors in prairie voles (*Microtus*  
554 *ochrogaster*). *Horm Behav* **95**, 94–102 (2017).
- 555 35. Dumais, K. M. & Veenema, A. H. Vasopressin and oxytocin receptor systems in the brain:  
556 Sex differences and sex-specific regulation of social behavior. *Front Neuroendocrinol* **40**,  
557 1–23 (2016).
- 558 36. Sharma, K. *et al.* Sexually dimorphic oxytocin receptor-expressing neurons in the preoptic  
559 area of the mouse brain. *PLoS ONE* **14**, e0219784 (2019).
- 560 37. Rhees, R. W., Al-Saleh, H. N., Kinghorn, E. W., Fleming, D. E. & Lephart, E. D.  
561 Relationship between sexual behavior and sexually dimorphic structures in the anterior  
562 hypothalamus in control and prenatally stressed male rats. *Brain Res Bull* **50**, 193–199  
563 (1999).
- 564 38. Swanson, L. W. Cerebral hemisphere regulation of motivated behavior. *Brain Res* **886**,  
565 113–164 (2000).
- 566 39. Grinevich, V. & Stoop, R. Interplay between Oxytocin and Sensory Systems in the  
567 Orchestration of Socio-Emotional Behaviors. *Neuron* **99**, 887–904 (2018).

- 568 40. Jurek, B. & Neumann, I. D. The Oxytocin Receptor: From Intracellular Signaling to  
569 Behavior. *Physiol Rev* **98**, 1805–1908 (2018).
- 570 41. Curley, J. P., Jensen, C. L., Franks, B. & Champagne, F. A. Variation in maternal and  
571 anxiety-like behavior associated with discrete patterns of oxytocin and vasopressin 1a  
572 receptor density in the lateral septum. *Horm Behav* **61**, 454–461 (2012).
- 573 42. Bales, K. L. & Perkeybile, A. M. Developmental experiences and the oxytocin receptor  
574 system. *Horm Behav* **61**, 313–319 (2012).
- 575 43. Alves, E., Fielder, A., Ghabriel, N., Sawyer, M. & Buisman-Pijlman, F. T. A. Early social  
576 environment affects the endogenous oxytocin system: a review and future directions.  
577 *Front. Endocrin.* **6**, 32 (2015).
- 578 44. Veinante, P. & Freund-Mercier, M.-J. Distribution of oxytocin- and vasopressin-binding  
579 sites in the rat extended amygdala: a histoautoradiographic study. *J Comp Neurol* **383**,  
580 305–325 (1997).
- 581 45. Knobloch, H. S. *et al.* Evoked Axonal Oxytocin Release in the Central Amygdala  
582 Attenuates Fear Response. *Neuron* **73**, 553–566 (2012).
- 583 46. Stoop, R. Neuromodulation by oxytocin and vasopressin. *Neuron* **76**, 142–159 (2012).
- 584 47. Grinevich, V., Knobloch-Bollmann, H. S., Eliava, M., Busnelli, M. & Chini, B.  
585 Assembling the Puzzle: Pathways of Oxytocin Signaling in the Brain. *Biol Psychiatry*  
586 (2015). doi:10.1016/j.biopsych.2015.04.013
- 587 48. Balleza, E., Kim, J. M. & Cluzel, P. Systematic characterization of maturation time of  
588 fluorescent proteins in living cells. *Nat Meth* **15**, 47–51 (2018).
- 589 49. Dietrich, J.-E. *et al.* Venus trap in the mouse embryo reveals distinct molecular dynamics  
590 underlying specification of first embryonic lineages. *EMBO Rep.* **16**, 1005–1021 (2015).
- 591 50. Crawley, J. N. *What's Wrong With My Mouse?* (John Wiley & Sons, 2007).  
592 doi:10.1002/0470119055
- 593 51. Theodosis, D. T. *et al.* Oxytocin and estrogen promote rapid formation of functional  
594 GABA synapses in the adult supraoptic nucleus. *Mol. Cell. Neurosci.* **31**, 785–794 (2006).
- 595 52. Micheva, K. D. & Beaulieu, C. Quantitative aspects of synaptogenesis in the rat barrel  
596 field cortex with special reference to GABA circuitry. *J Comp Neurol* **373**, 340–354  
597 (1996).
- 598 53. Mody, M. *et al.* Genome-wide gene expression profiles of the developing mouse  
599 hippocampus. *Proc Natl Acad Sci USA* **98**, 8862–8867 (2001).
- 600 54. Kroon, T., van Hugte, E., van Linge, L., Mansvelder, H. D. & Meredith, R. M. Early  
601 postnatal development of pyramidal neurons across layers of the mouse medial prefrontal  
602 cortex. *Sci Rep* **9**, 5037 (2019).
- 603 55. van der Bourg, A. *et al.* Layer-Specific Refinement of Sensory Coding in Developing  
604 Mouse Barrel Cortex. *Cereb Cortex* **27**, 4835–4850 (2017).
- 605 56. Kast, R. J. & Levitt, P. Precision in the development of neocortical architecture: From  
606 progenitors to cortical networks. *Prog. Neurobiol.* **175**, 77–95 (2019).
- 607 57. Blitzer, D. S., Wells, T. E. & Hawley, W. R. Administration of an oxytocin receptor  
608 antagonist attenuates sexual motivation in male rats. *Horm Behav* **94**, 33–39 (2017).
- 609 58. Chon, U., Vanselow, D. J., Cheng, K. C. & Kim, Y. Enhanced and Unified Anatomical  
610 Labeling for a Common Mouse Brain Atlas. *bioRxiv* 636175 (2019). doi:10.1101/636175
- 611 59. Kuan, L. *et al.* Neuroinformatics of the Allen Mouse Brain Connectivity Atlas. *Methods*  
612 **73**, 4–17 (2015).
- 613 60. Hawrylycz, M. *et al.* Digital Atlasing and Standardization in the Mouse Brain. *PLoS*

- 614            *Comput Biol* **7**, e1001065 (2011).
- 615    61.    Oh, S. W. *et al.* A mesoscale connectome of the mouse brain. *Nature* **508**, 207–214  
616            (2014).
- 617    62.    Bienkowski, M. S. *et al.* Integration of gene expression and brain-wide connectivity  
618            reveals the multiscale organization of mouse hippocampal networks. *Nat Neurosci* **21**,  
619            1628–1643 (2018).
- 620    63.    Hidema, S. *et al.* Generation of Oxt<sup>r</sup> cDNA(HA) -Ires-Cre Mice for Gene Expression in  
621            an Oxytocin Receptor Specific Manner. *J. Cell. Biochem.* (2015). doi:10.1002/jcb.25393
- 622    64.    Schindelin, J. *et al.* Fiji: an open-source platform for biological-image analysis. *Nat Meth*  
623            **9**, 676–682 (2012).
- 624
- 625



626 **Figure legend**

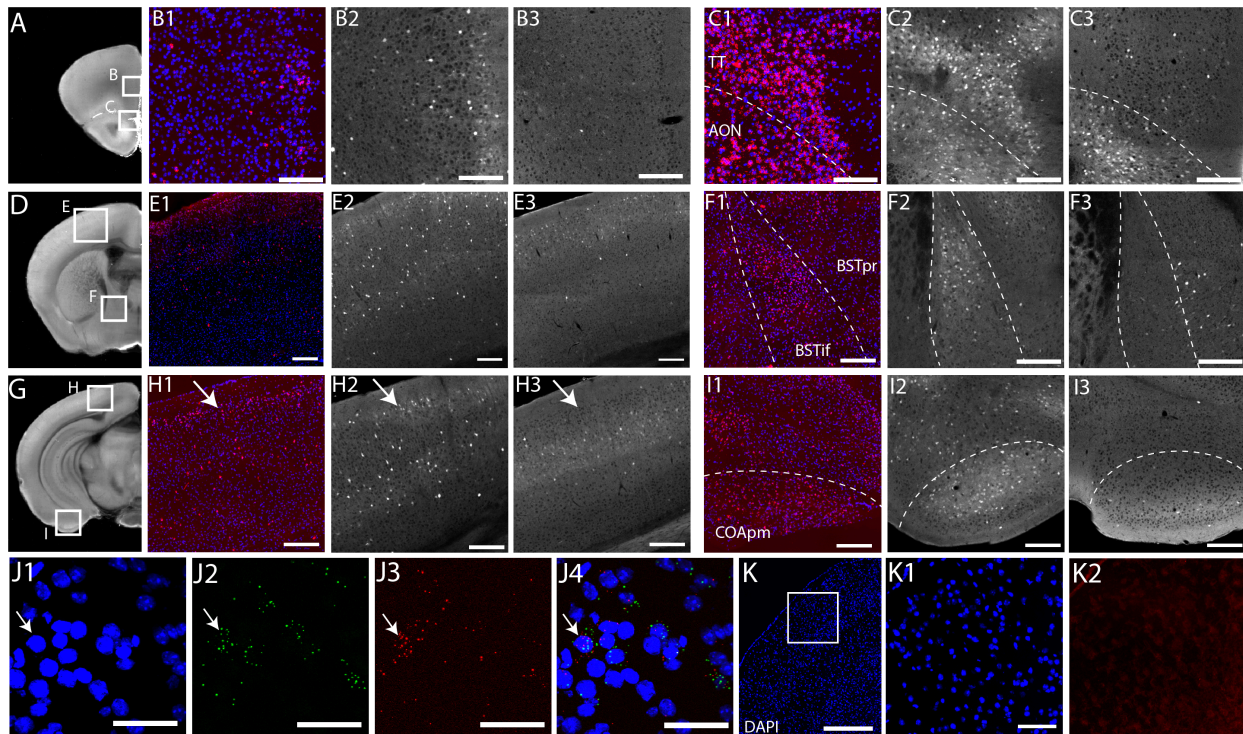

627

628 **Figure 1. Characterization of OTR transgenic reporter mice**

629 (A-I) Comparison between the OTR fluorescent *in situ* hybridization and OTR transgenic  
630 reporter mouse lines at P21. Scale bar = 200 μm. The white boxes in the first column represent  
631 brain regions in zoomed-in pictures on subsequent columns. The second and the fifth column for  
632 the OTR *in situ*, the third and the sixth for the OTR-Venus mice, and the fourth and the seventh  
633 for the OTR-eGFP mice. (B) the prelimbic cortex, (C) the taenia tecta (TT) and the anterior  
634 olfactory nucleus (AON), (E) the primary somatosensory cortex, (F) the bed nucleus of stria  
635 terminalis (BST) interfascicular (if) and principal (pr) nucleus, (H) the visual cortex, and (I) the  
636 cortical amygdala posterior medial (COApm) area. Note the corresponding patterns between the  
637 OTR *in situ* and the OTR-Venus, but not OTR-eGFP. (J) Double fluorescent *in situ* against the  
638 OTR and the Venus in the cortex from the OTR-Venus mice. (J1) DAPI nuclear staining, (J2)  
639 Venus *in situ*, (J3) OTR *in situ*, and (J4) the merged view. The white arrows indicate an example  
640 of both OTR and Venus positive cells. Scale bar = 50 μm. (K) OTR *in situ* hybridization on OTR  
641 knockout (OTR<sup>venus/venus</sup>) mice. (K1) DAPI staining and (K2) OTR *in situ* in the somatosensory  
642 cortex from the white boxed area in K. Note the lack of OTR puncta. Scale bar = 400 μm for (K)  
643 and 100 μm for (K1-2).

644

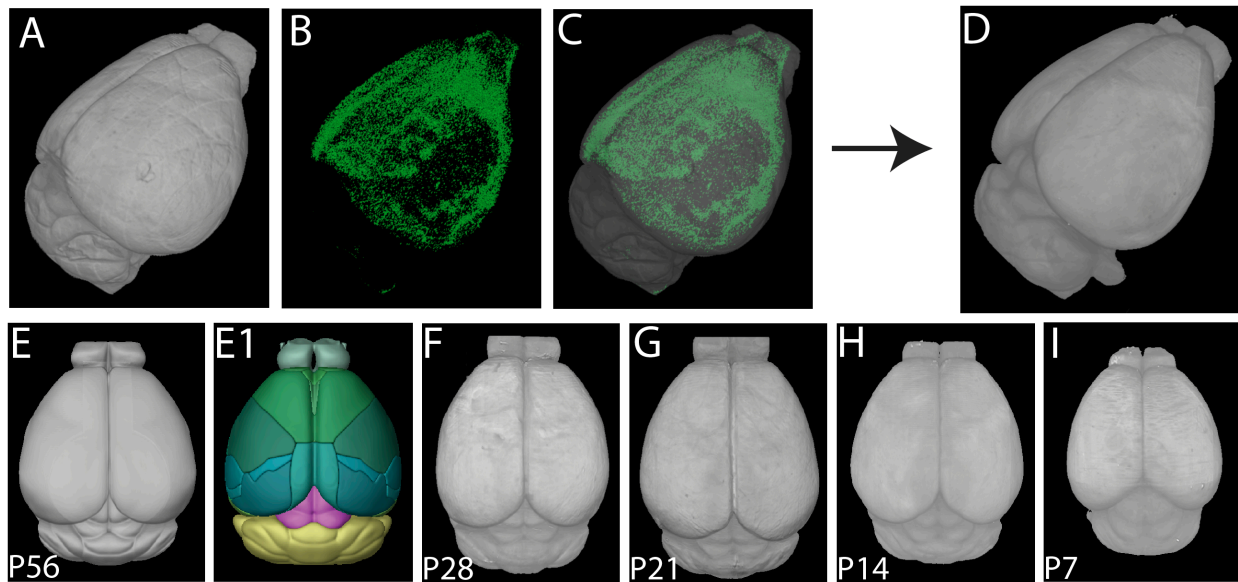

645

646 **Figure 2. Quantitative brain mapping method to examine OTR expression in developing**  
647 **postnatal mouse brains.**

648 (A-C) Reconstructed 3D brains from serial two-photon tomography imaging of the P14 OTR-  
649 Venus mouse brain (A), detected Venus positive cells (B), and their overlay (C). (D) The  
650 registration template brain for automated cell counting for P14 brains. (E-I) Template brains at  
651 different postnatal ages. (E) The adult Allen CCF background template and (E1) its anatomical  
652 labels (E1). Newly generated template brains at P28 (F), P21 (G), P14 (H), and P7(I).

653

654

655

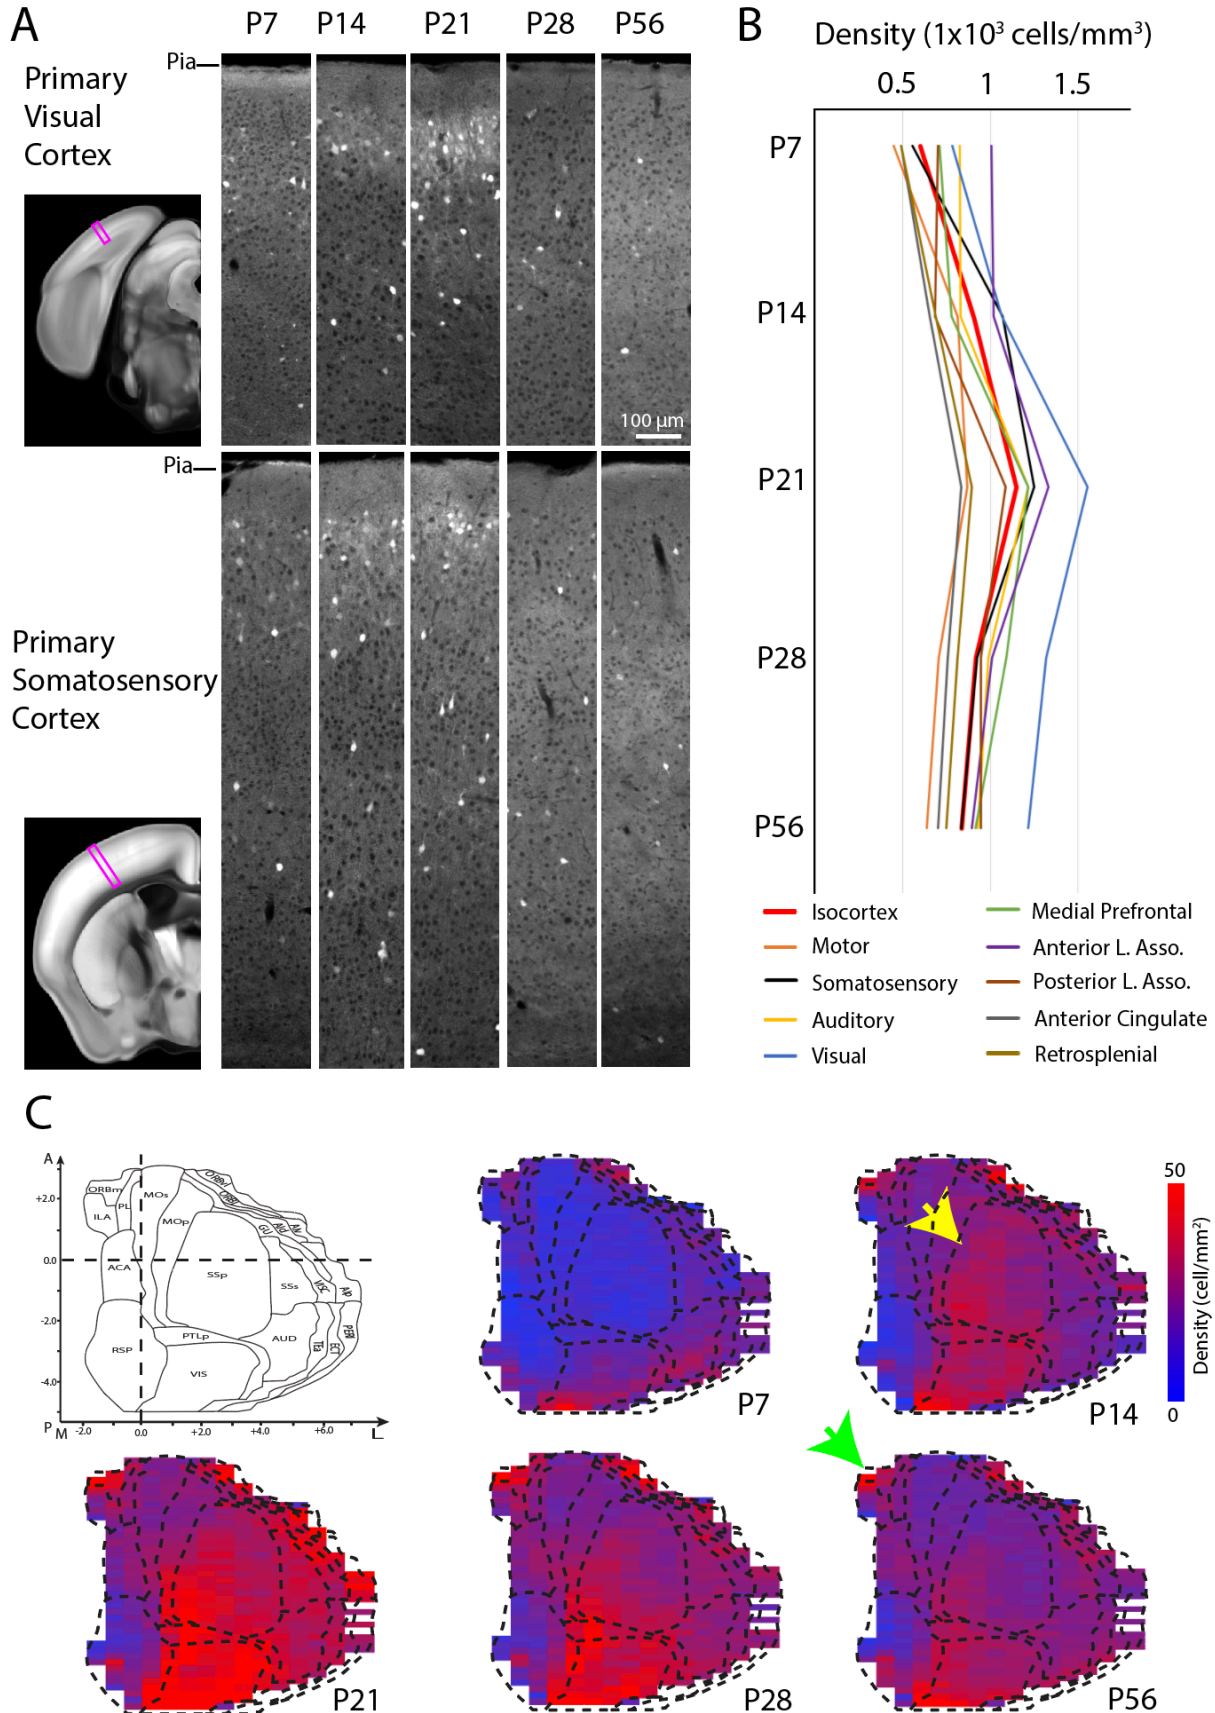

656

657 **Figure 3. Developmental trajectory of OTR cells in the isocortex from OTR-Venus mice.**  
658 (A) Representative images from the primary visual and the primary somatosensory cortices  
659 (purple boxes) in OTR<sup>Venus/+</sup> mice at P7, 14, 21, 28, and 56 (columns to the right). Note clustered  
660 and dispersed OTR expression in the superficial and deep cortical layers, respectively.  
661 (B) Average densities of OTR-Venus cells in different isocortical areas at 5 different postnatal  
662 ages. Anterior lateral (L) association (Asso) area for lateral orbital, gustatory, visceral, agranular  
663 insular; Posterior L. Asso. for temporal association, perirhinal, ectorhinal cortex. See Table S1  
664 for more details. (C) 2D cortical flatmap representation of OTR-Venus expression pattern at  
665 different developmental time points. The heat map represents OTR-Venus densities in evenly  
666 spaced bins in the cortical flatmap. Note overall peak expression in all cortical regions at P21.  
667 See also Figure S3 for layer specific cortical flatmaps. The yellow at P14 and the green arrow at  
668 the P56 flatmap highlights somatosensory cortex and medial prefrontal cortex, respectively. Full  
669 name of acronyms can be found in Table S1.

670

671

672

673

674

675



676

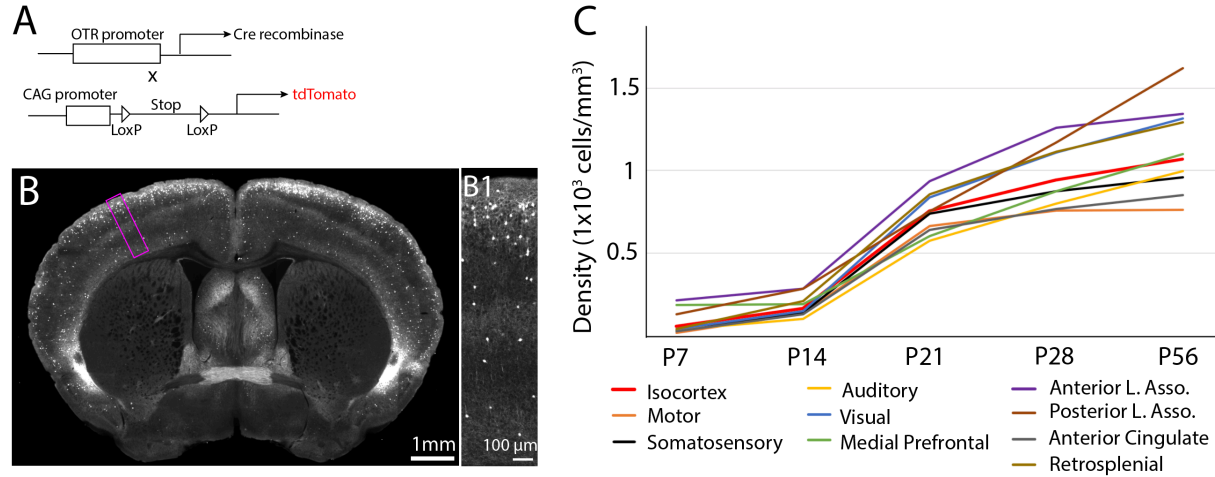

677

678 **Figure 4. OTR down regulation is largely driven by receptor down-regulation**

679 (A) Experimental design to permanently label transient OTR positive neurons by crossing OTR-  
680 Cre with Cre dependent reporter mice (OTR-Cre: Ai14). (B) Example of an adult OTR-Cre: Ai14  
681 brain. (B1) High magnification image of purple boxed area in (B). Note the abundant tdTomato  
682 positive cells in the upper layer from the developmental labeling. (C) Average density of  
683 tdTomato (+) cells in different isocortical regions at different developmental time points.

684

685

686

687

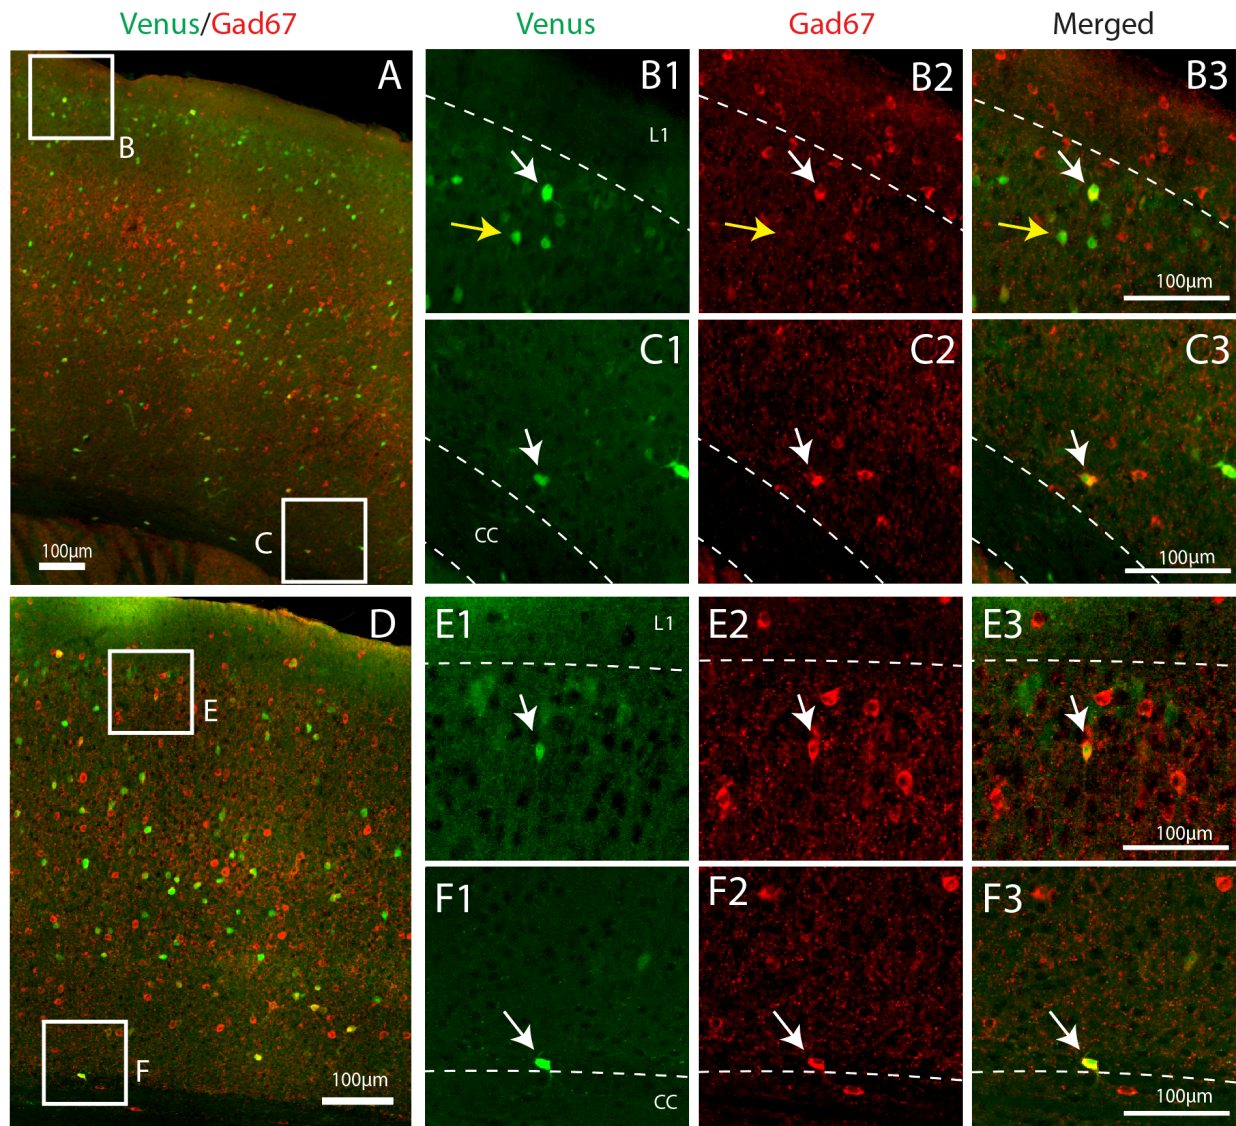

688

689 **Figure 5. OTR cell types in the cortex**

690 (A-E) Gad67 antibody immunohistochemistry staining (red) from motor-somatosensory cortical  
691 area at around bregma A/P = -0.7 mm from P21 (A-C) and P56 (D-E) OTR-Venus mice (green).  
692 (B-C, E-F) from the upper layer (B, E) and the layer 6b (C, F). white arrows for Venus (+) cells  
693 co-expressing Gad67, and yellow arrows for Venus (+) cells without Gad67 colocalization. L1 in  
694 (B, E) = layer 1, cc in (C, F) = corpus callosum.

695

696

697

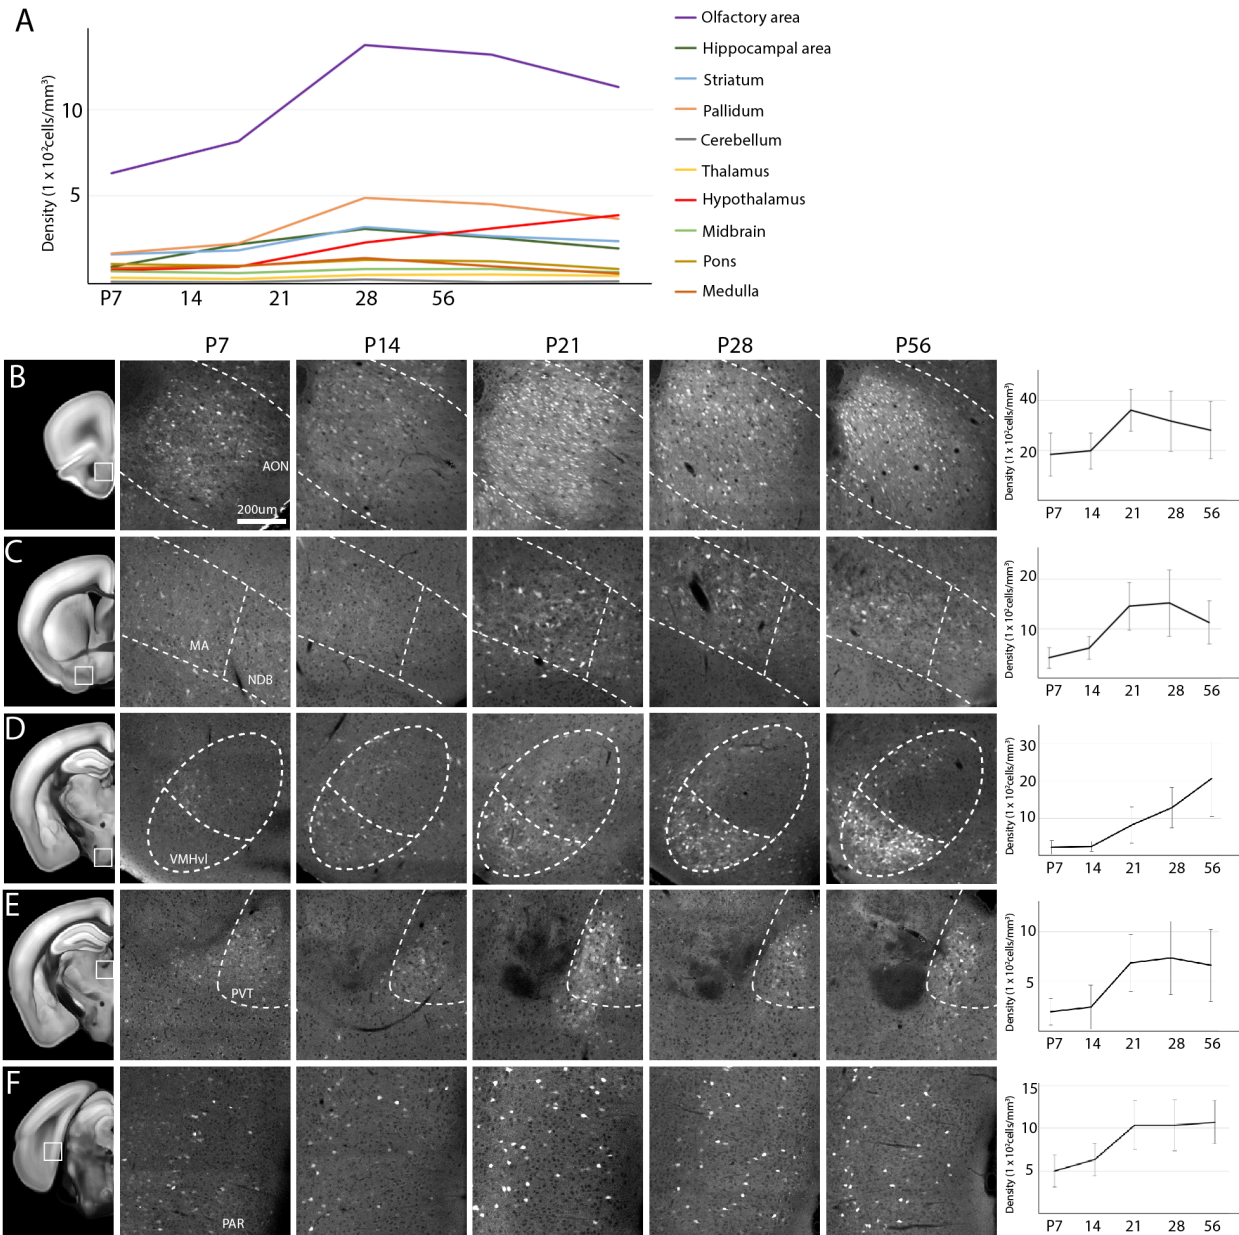

698

699 **Figure 6. Temporal expression pattern of OTR neurons in other cortical and subcortical**  
 700 **regions**

701 (A) Average density of OTR neurons in ten different major sub-regions of the brain at postnatal  
 702 development periods. (B-F) Notable brain regions with different temporal expression patterns.

703 The first column highlights anatomical region of interest with white boxes in the adult reference  
 704 brain. Mid columns represent zoomed-in picture of highlighted brain regions at different ages  
 705 between P7 – P56. The last column is for the OTR (+) cell density measurement of the selected  
 706 region (mean ± standard deviation). (B) The anterior olfactory nucleus (AON). (C) The

707 magnocellular regions (MA) and the nucleus of diagonal band (NDB) in the basal forebrain area.  
708 (D) The ventral medial hypothalamus ventral medial (VMHvl) in hypothalamic areas. (E) The  
709 paraventricular thalamus (PVT) in thalamus. (F) The presubiculum (PRE) as a part of the  
710 retrohippocampal region.

711

712

713



714

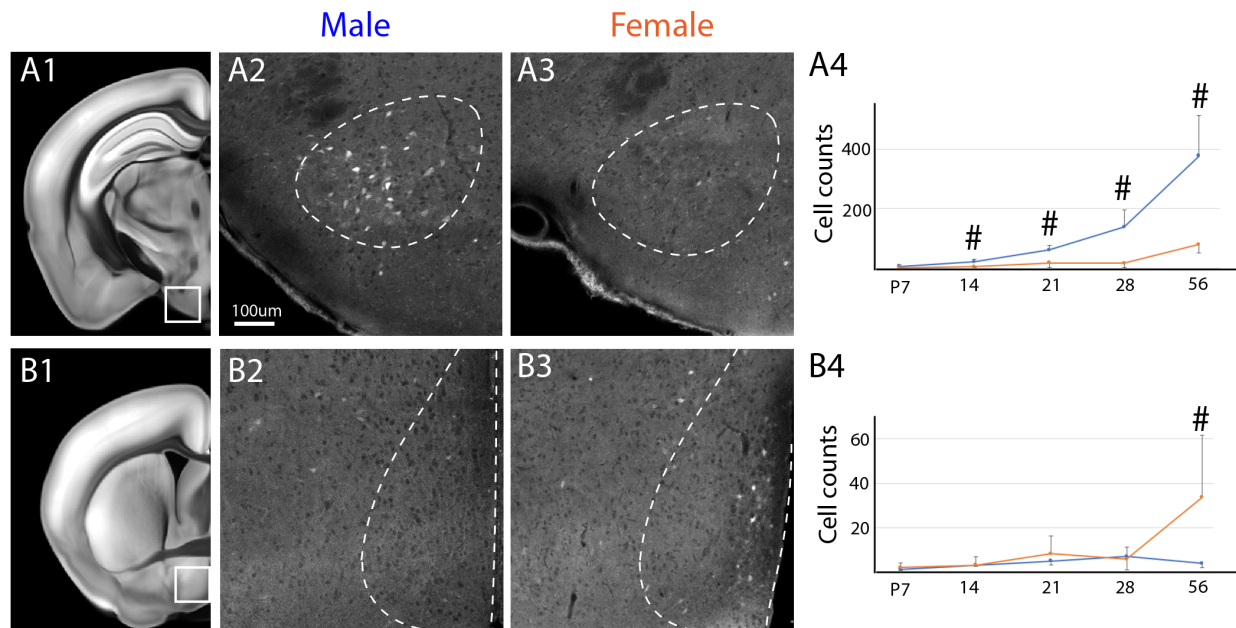

715

716

717 **Figure 7. Sexually dimorphic expression of OTR neurons**

718 (A) The ventral premammillary nucleus (PMv) showed significantly higher density of OTR cells  
719 in males than females from P14. (B) In contrast, the anteroventral periventricular nucleus  
720 (AVPV) near the medial preoptic nucleus showed significantly higher OTR cells in females than  
721 males at P56 but not before. The first column is to highlight anatomical regions of interest in an  
722 adult reference brain. 2<sup>nd</sup> and 3<sup>rd</sup> columns are zoomed-in pictures from P56 adult male and  
723 female OTR-Venus brains, respectively. The last column is density measurement over time  
724 (mean  $\pm$  standard deviation). # denotes statistically significant data with false discovery rate less  
725 than 0.05 after multiple comparison correction.

726

| Brain area                      | P21               |                   |                | P56              |                   |                |
|---------------------------------|-------------------|-------------------|----------------|------------------|-------------------|----------------|
|                                 | Upper layer       | Deeper layer      | Layer 6b       | Upper layer      | Deeper layer      | Layer 6b       |
| <b>Medial prefrontal cortex</b> | 17%<br>(99/576)   | 20%<br>(123/619)  | 56%<br>(32/56) | 24%<br>(78/326)  | 29%<br>(123/421)  | 62%<br>(16/26) |
| <b>Somatosensory cortex</b>     | 13%<br>(156/1191) | 19%<br>(301/1581) | 73%<br>(36/49) | 13%<br>(120/927) | 17%<br>(241/1399) | 74%<br>(38/51) |
| <b>Visual Cortex</b>            | 18%<br>(123/671)  | 15%<br>(214/1404) | 92%<br>(43/46) | 19%<br>(131/691) | 19%<br>(342/1809) | 86%<br>(40/46) |

727

728 **Table 1. Gad67 colocalization with cortical OTR-Venus neurons.**

729 Data from the medial prefrontal cortex (at around Bregma A/P:+1.6), the somatosensory cortex  
730 (at around Bregma A/P:-1.0), and the visual cortex (at around Bregma A/P:-3.5). Data presented  
731 as percentage of colocalized cells (OTR and Gad positive cells/total OTR positive cells) in each  
732 brain region.

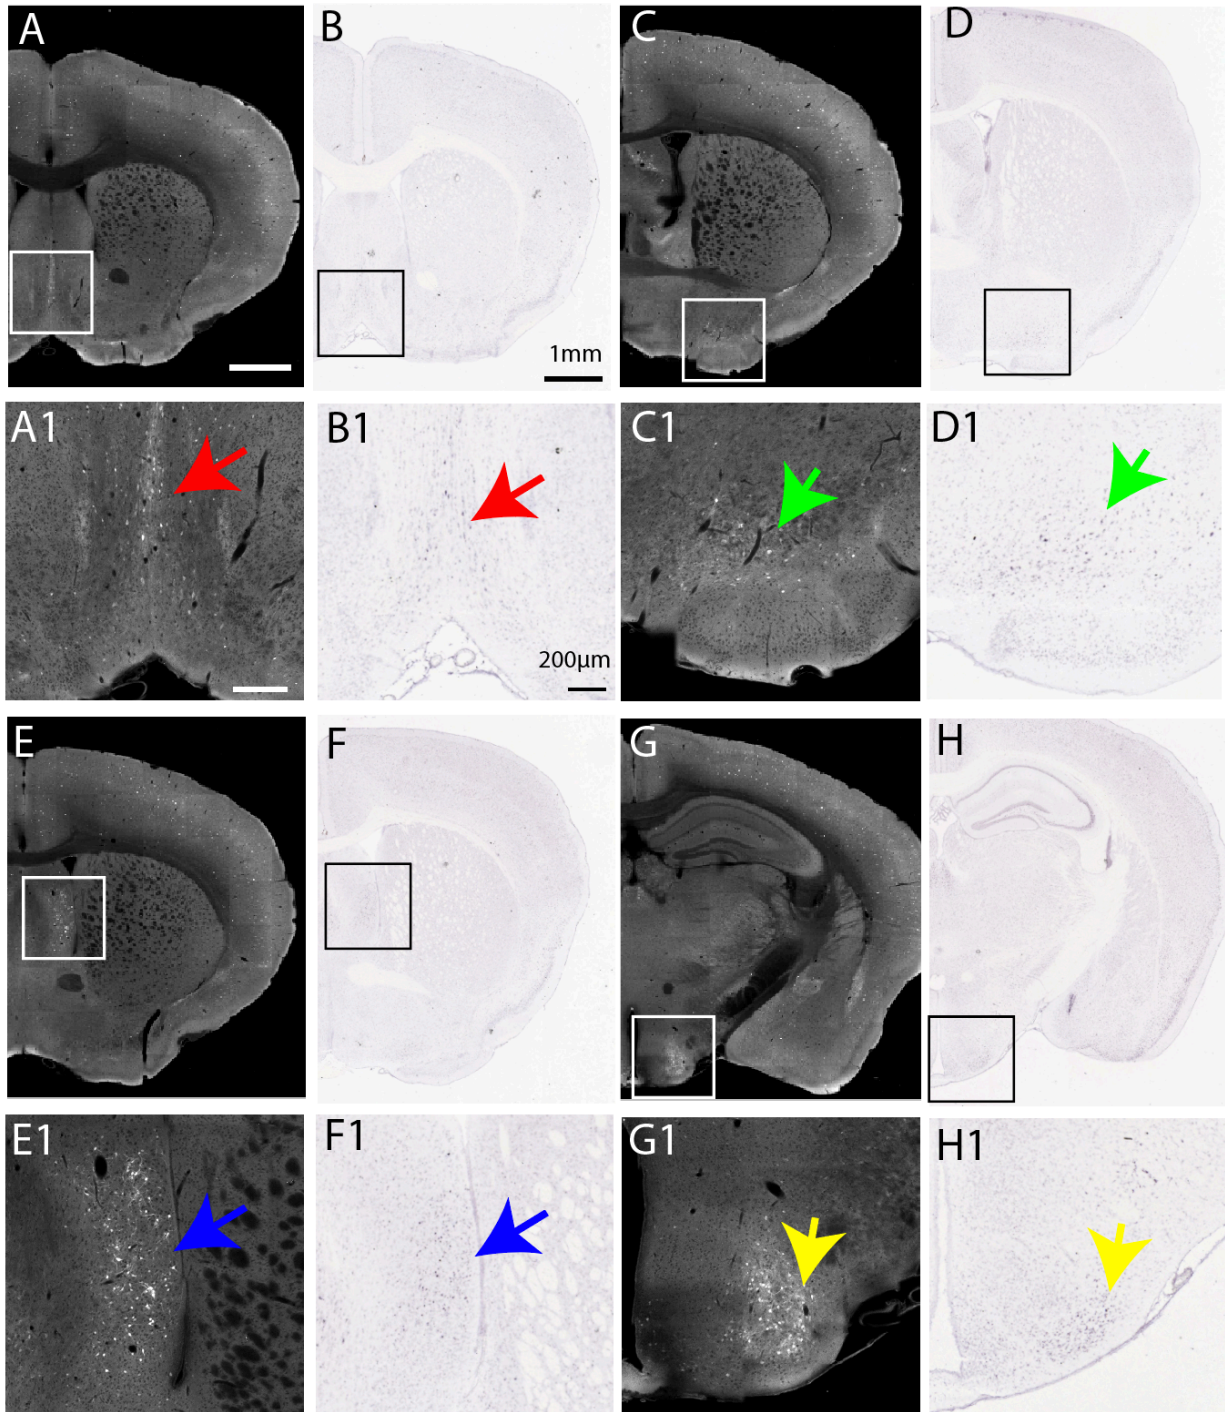

733

734 **Figure S1. Comparison between Venus expression from OTR-Venus mice and OTR mRNA**  
735 ***in situ* at adult age.**

736 Venus expression from OTR-Venus (left column) and OTR *in situ* result (right column) from  
737 Allen in situ database (<https://mouse.brain-map.org/experiment/show/75081001>) in four different  
738 example areas: the medial septum (A-B), the nucleus of diagonal band (C-D), the lateral septum

739 (E-F), and the ventral medial hypothalamus ventral lateral (G-H). The second row from each  
740 region is a zoomed-in view of the boxed areas in the first row of pictures. Note the matched  
741 pattern between OTR-Venus mice and endogenous OTR expression from the *in situ* data.

742

743

744

745

746



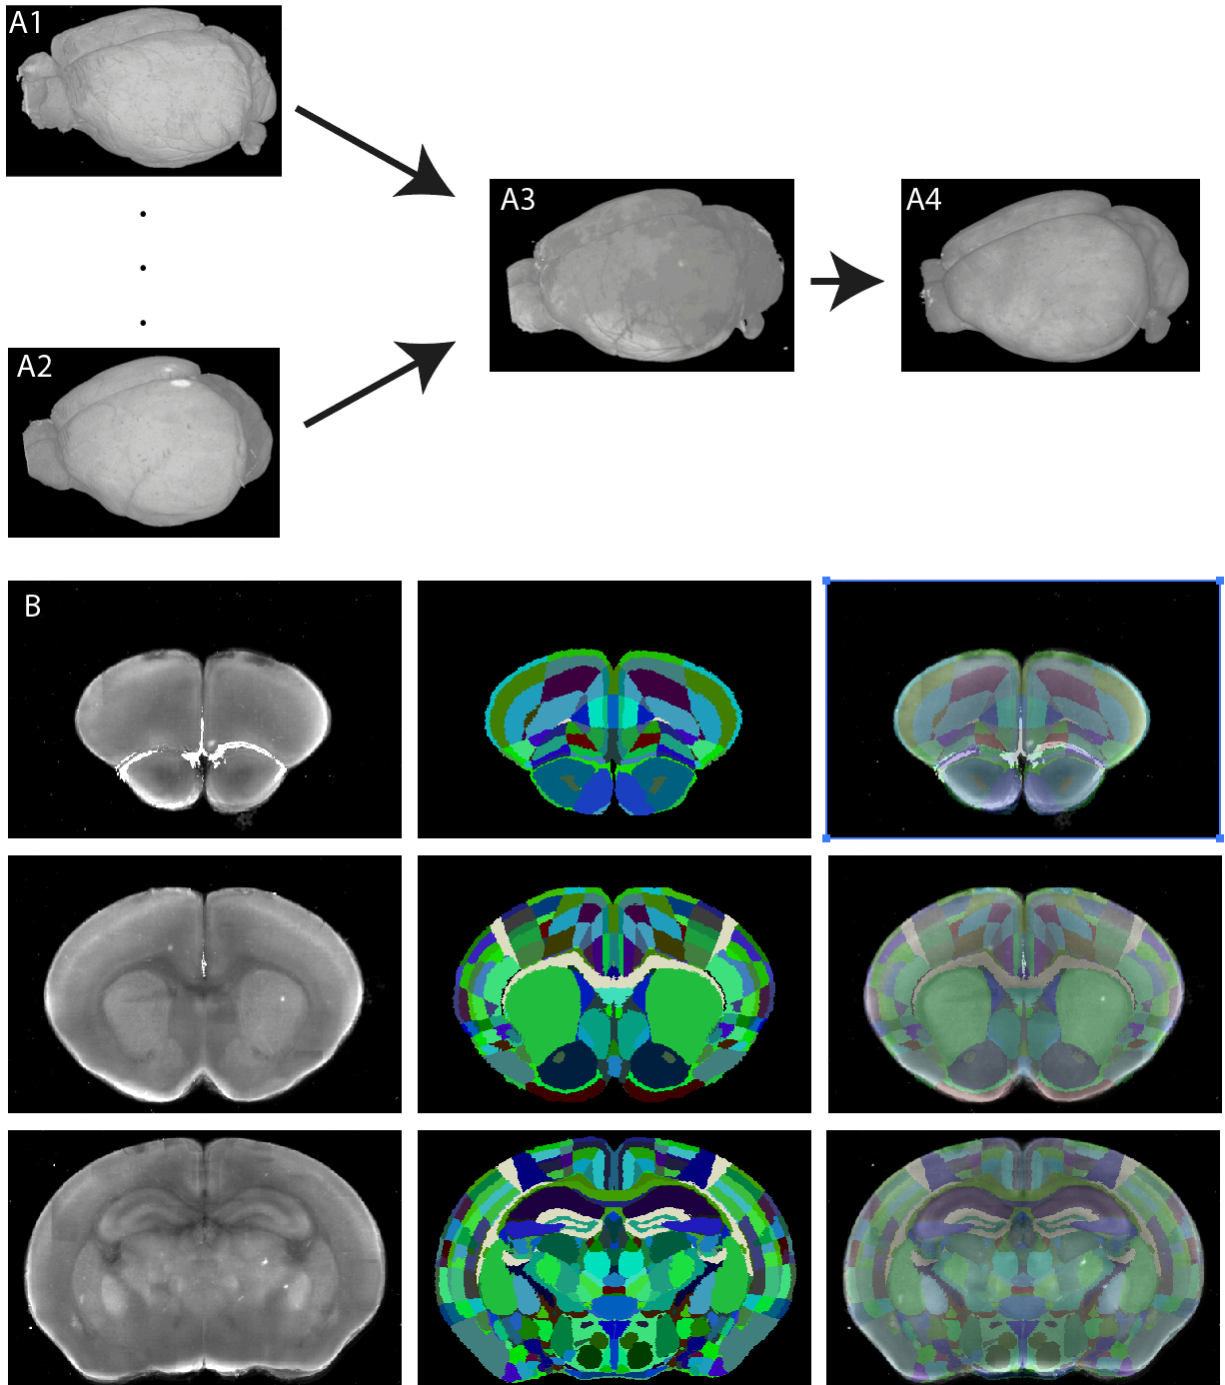

747

748 **Figure S2. Generating age matched template brains and related anatomical labels.**

749 (A) Individual 3D brains (A1, A2) were registered to one best imaged sample (A3) from each  
750 age group. Registered brains were averaged to generate a template brain (A4) at each age. (B)

751 Examples of anatomical labels from the P7 template brain. Row represents different areas in  
752 anterior and posterior axis. The first column is coronal view of the template brain, the second

753 column for registered anatomical labels and the third row for the overlay between the template

754 brain and labels.

755

756

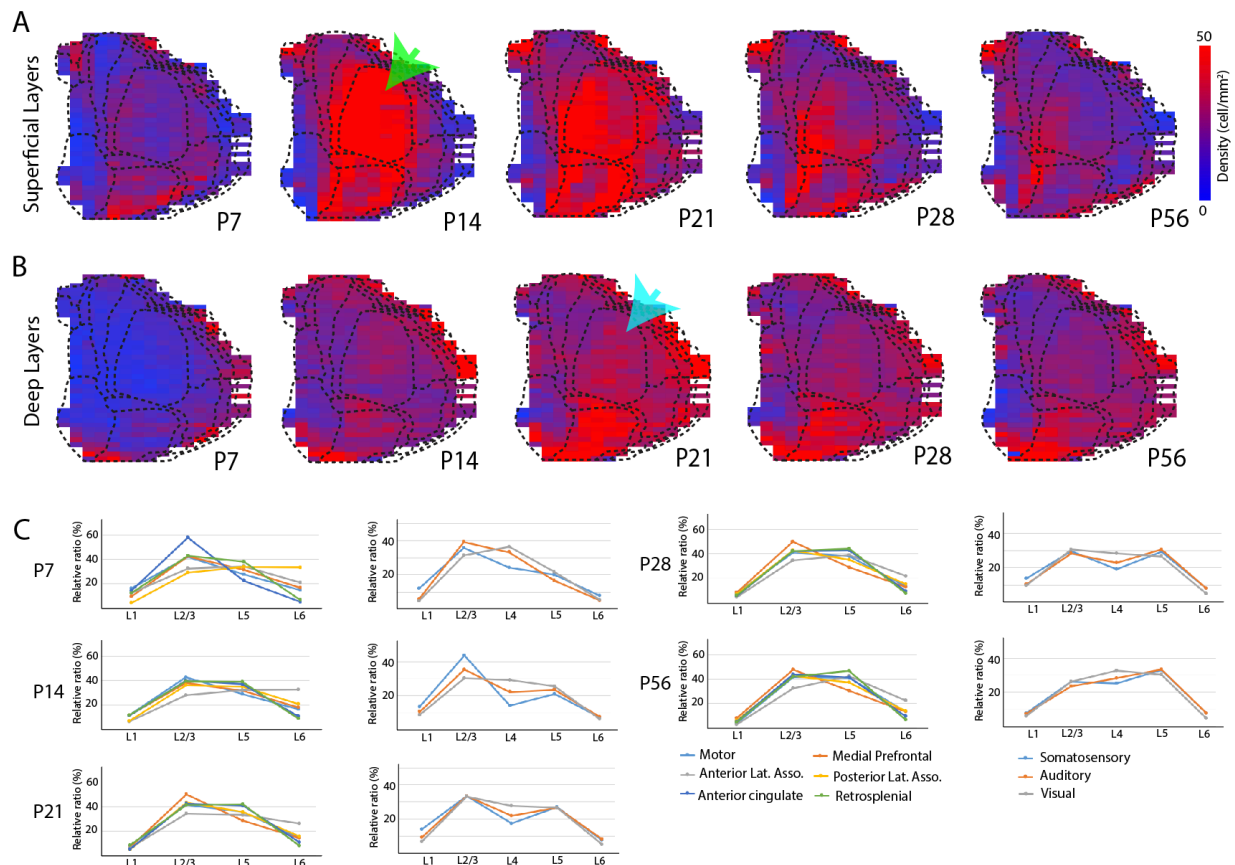

757

758 **Figure S3. OTR expression in the layer specific cortical flatmap from OTR-Venus mice.**

759 (A-B) OTR-Venus expression patterns in the 2D cortical flatmap from superficial (A, layer 1-3)

760 and deep (B, layer 5-6) layers at different postnatal ages. The heat map displays the visual

761 representation of density. Note peak OTR density in the somatosensory cortex at P14 in the

762 superficial layer flatmap (green arrow in A) while the peak at P21 in the deep layer flatmap (light

763 blue arrow in B) for temporally heterogeneous OTR expression. (C) Relative densities of OTR-

764 Venus cells across cortical layers in brain regions with motor and associative cortex (left

765 column), and sensory cortex with layer 4 (right column). Density in each layer is normalized by

766 total density of the whole layer in each brain region.

767

768 **Table S1. A list of OTR Densities across different brain regions at different postnatal ages.**

769 Column A: Acronym of brain regions, Column B: Full names, Column C-G: Average density

770 (cell/mm<sup>3</sup>) at different postnatal ages. These columns are conditionally formatted with red color

771 to highlight areas with high density. The heatmap color range between 0 (transparent) and 5000  
772 (red). Column H-L: standard deviation at different postnatal ages.

773

774 **Movie S1-5: Quantitative OTR density mapping overlaid in age matched reference brains.**

775 Averaged OTR densities per evenly spaced and overlapping voxel (100  $\mu\text{m}$  diameter sphere, 20

776  $\mu\text{m}$  spacing between voxels) per postnatal age with the green heatmap to represent densities. The

777 heatmap ranges between 0 (transparent) and 10 (green) cells/voxel. Left: overlay on the reference

778 brain. Right: overlay on anatomical segmentations.

779 Movie S1 for P56, Movie S2 for P28, Movie S3 for P21, Movie S4 for P14, and Movie S5 for P7

780

781

782

783

784

785

786
